# Supplementary material for: Red-listed plants are contracting their elevational range faster than common plants in the European Alps
Source: PubMed Central journal article supplement — Proc Natl Acad Sci U S A. 2023 Mar 13;120(12):e2211531120. doi: 10.1073/pnas.2211531120 (PMC10041064; doi:10.1073/pnas.2211531120), 2023-03-13
Supplement: pnas.2211531120.sapp.pdf [file pnas.2211531120.sapp.pdf]

## **Supplementary Information for** Red-listed plants are contracting their elevational range faster than common plants in the European Alps

Costanza Geppert, Alessio Bertolli, Filippo Prosser, Lorenzo Marini

Costanza Geppert, Lorenzo Marini  
costanzageppert@gmail.com, lorenzo.marini@unipd.it

### **This PDF file includes:**

Figures S1 to S5  
Tables S1 to S3.

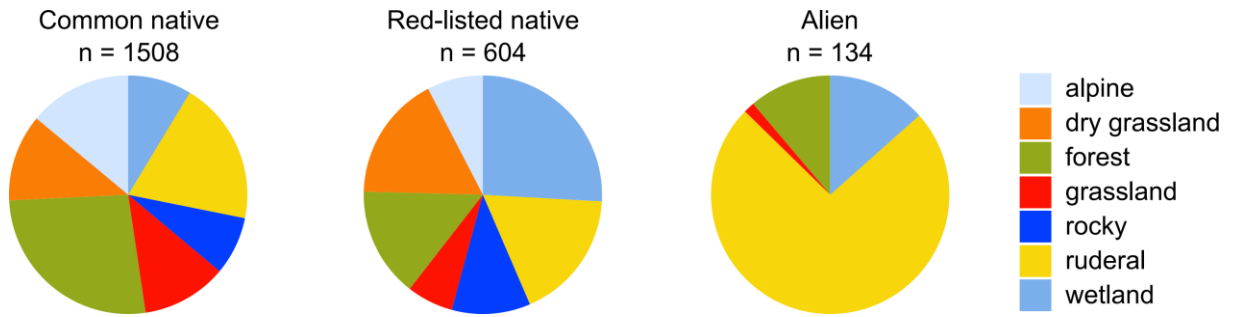

**Fig S1.** Proportion of species belonging to each habitat preference category for common native, red-listed native and alien species.

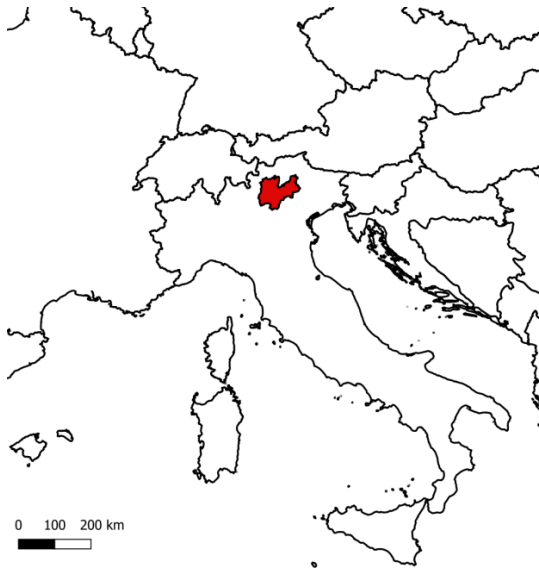

**Fig. S2** Study area. Trento Province located in NE Italy, covering 6'207 km<sup>2</sup> over an elevational range of 66–3'769 m a.s.l.

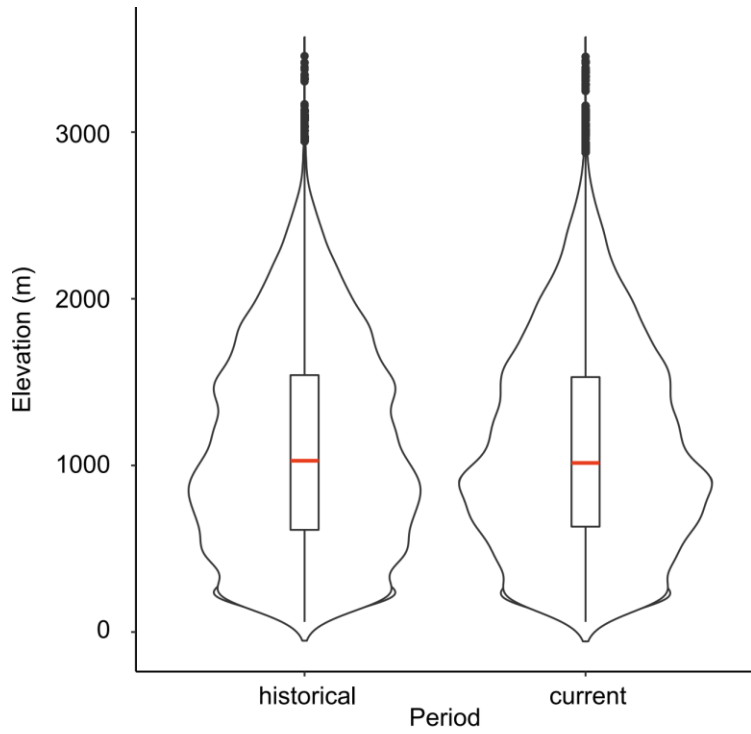

**Fig. S3.** Violin plots describing the record distribution along the elevational gradient in the historical and current period (1990-2004 vs. 2005-2019). The box indicates the interquartile range, with the black vertical lines showing the lower (25%) and upper quartiles (75%) and the red horizontal line indicating record median elevation.

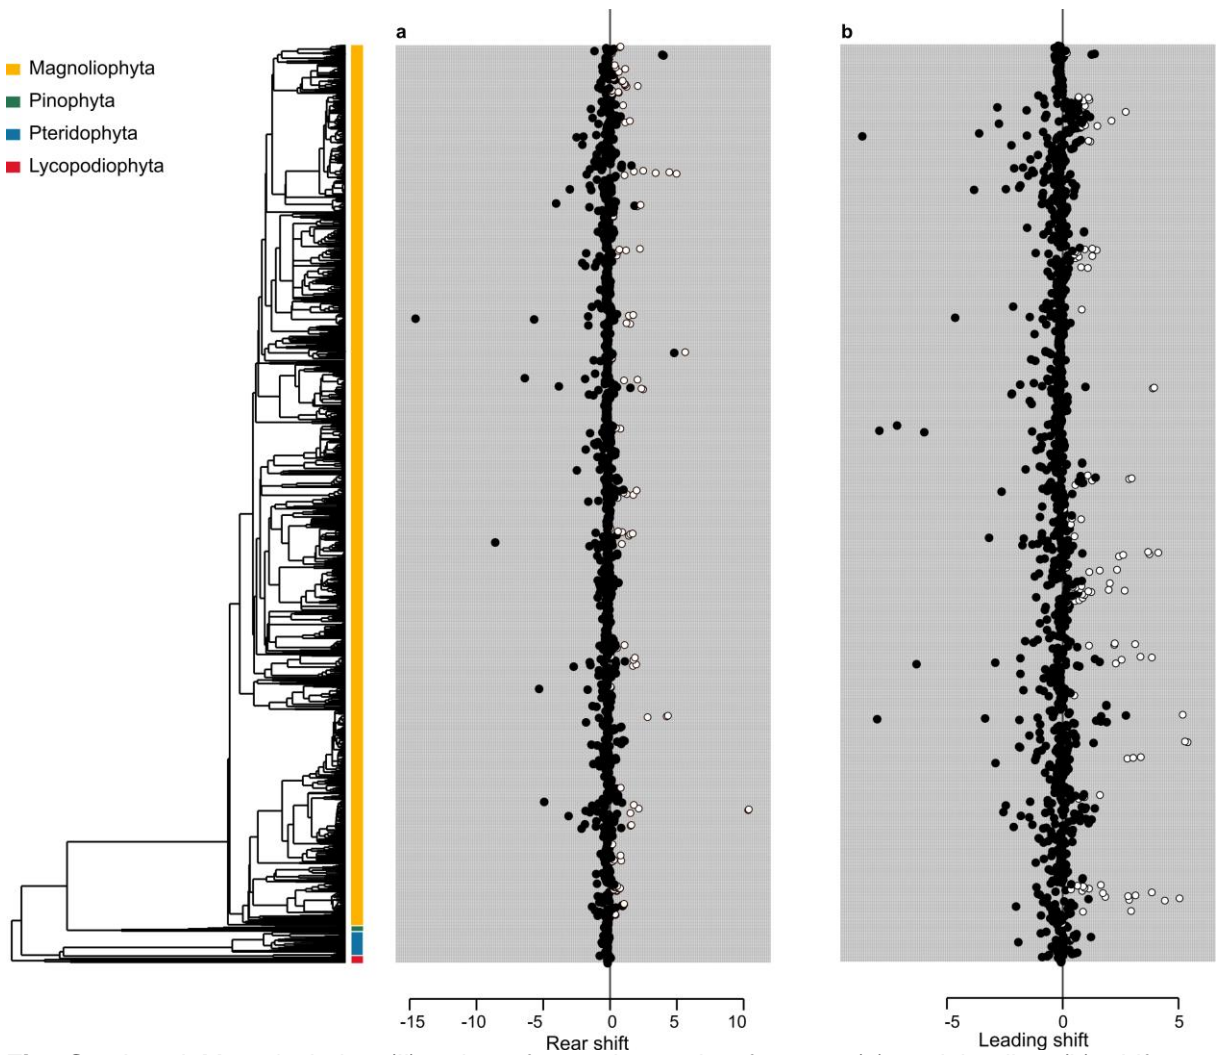

**Fig. S4.** Local Moran's index ( $l_i$ ) values for each species for rear (a) and leading (b) shift computed with `lipaMoran` and plotted with `dotplot.phylo4d`. White points indicate significant  $l_i$  values. Different colours highlight different phyla along the phylogenetic tree. Overall, we observed only weak positive phylogenetic correlation in a few clusters. Global metrics suggested a weak phylogenetic signal (Table S3).

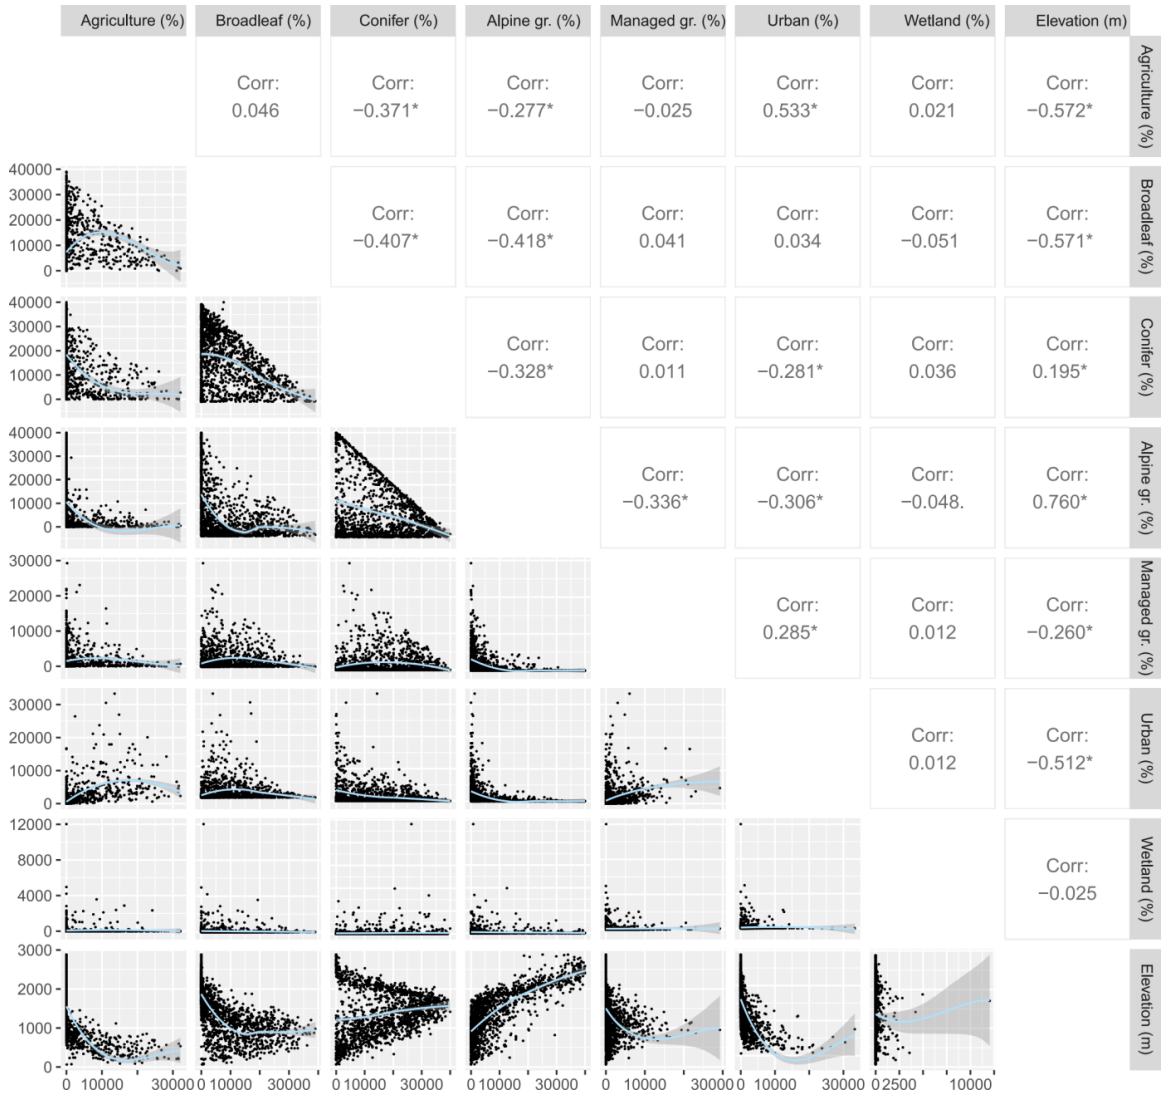

**Fig. S5.** Correlation between mean elevation and cover of agriculture, broadleaf forest, conifer forest, alpine grassland, managed grassland, urban, and wetland quantified (ha) in each grid cell ( $2 \times 2 \text{ km}^2$ ). Light blue lines indicate a smooth local regression. Corr indicates the Pearson's correlation coefficient.

**Table S1.** Effect of status (common native red-listed native and alien), edge type (rear and leading) and their interaction on rate of range shift. We fitted a non-parametric permutation test with species as random effect (N permutations = 1000) using the aovp function in the ImPerm package with default settings. N = 1,479 species.

| Fixed effect       | df | SS   | P-value |
|--------------------|----|------|---------|
| Status             | 2  | 26   | 1.000   |
| Edge type          | 1  | 467  | 1.000   |
| Status x Edge type | 2  | 1098 | <0.001  |

**Table S2.** Effect of status (common native red-listed native and alien), edge type (rear and leading) and their interaction on rate of range shift. We fitted a non-parametric permutation two-way between-within subjects ANOVA with species as random effect using the function bwtrim() in the R package WRS2. N permutations = 1000. The response variable shift was transformed by trimming means by 5 %, 10 %, 20 % and 30 % (two tails). N = 1,479 species.

| Trim level for the mean (%) | Fixed effect       | Q      | P-value |
|-----------------------------|--------------------|--------|---------|
| 0.05                        | Status             | 0.332  | 0.718   |
|                             | Edge type          | 0.188  | 0.665   |
|                             | Status × Edge type | 19.810 | <0.01   |
| 0.10                        | Status             | 0.839  | 0.435   |
|                             | Edge type          | 0.110  | 0.741   |
|                             | Status × Edge type | 25.829 | <0.01   |
| 0.20                        | Status             | 1.477  | 0.234   |
|                             | Edge type          | 0.015  | 0.903   |
|                             | Status × Edge type | 29.227 | <0.01   |
| 0.30                        | Status             | 2.053  | 0.137   |
|                             | Edge type          | 0.112  | 0.739   |
|                             | Status × Edge type | 28.737 | <0.01   |



**Table S3.** Results from tests of a phylogenetic signal in the distribution of the leading and rear shift.  $C_{\text{mean}}$  = the Abouheif's  $C_{\text{mean}}$  index;  $I$  = the Moran's  $I$  index;  $K$  = Blomberg's  $K$ ,  $K^*$  = Blomberg's  $K^*$  and  $\lambda$  = Pagel's  $\lambda$ . We used the function `phyloSignal()` of the R package `phylosignal` (see Methods for details).  $N = 1,234$  species. Moran's  $I$  and Abouheif's  $C_{\text{mean}}$  are autocorrelation indices not based on an evolutionary model, whereas, Blomberg's  $K$ ,  $K^*$  and Pagel's  $\lambda$  assume a Brownian motion of trait evolution (Münkemüller et al., 2012). Hence, a value of  $K$ ,  $K^*$  or  $\lambda$  close to zero indicates phylogenetic independence and a value of one indicates that species' traits are distributed under Brownian motion. Reported values for the distribution of the leading and rear shift are close to 0 and, therefore, indicate phylogenetic independence. Overall, all indices usually show high uncertainties in P-values for random trait distributions and they are strongly influenced by sample size (Münkemüller et al., 2012). This explains the high variability and small values of the observed P-values. The index most affected by sample size is Moran's  $I$ , while the least affected is Pagel's  $\lambda$ . In addition, Pagel's  $\lambda$  shows the smallest type I error when testing for phylogenetic signal against random expectations. Here, Pagel's  $\lambda$  reported no phylogenetic signal for both leading and rear shift distribution.

| Response variable | Test              | Statistic | P-value |
|-------------------|-------------------|-----------|---------|
| Leading shift     | $C_{\text{mean}}$ | 0.032     | 0.048   |
|                   | $I$               | 0.001     | 0.067   |
|                   | $K$               | 0.024     | 0.394   |
|                   | $K^*$             | 0.057     | 0.692   |
|                   | $\lambda$         | 0.028     | 1.000   |
| Rear shift        | $C_{\text{mean}}$ | 0.057     | 0.004   |
|                   | $I$               | 0.003     | 0.012   |
|                   | $K$               | 0.022     | 0.775   |
|                   | $K^*$             | 0.056     | 0.699   |
|                   | $\lambda$         | <0.001    | 1.000   |

#### Reference

Münkemüller, T., Lavergne, S., Bzeznik, B., Dray, S., Jombart, T., Schiffers, K., & Thuiller, W. (2012). How to measure and test phylogenetic signal. *Methods in Ecology and Evolution*, 3, 743-756.
